# Supplementary material for: Worldwide Surveillance Actions and Initiatives of Drinking Water Quality: A Scoping Review
Source: Preprints.org preprint supplement (doi:10.20944/preprints202209.0214.v1), 2022-09-15
Supplement: Supplementary file 2 [file Table_S.1.docx]

**Table S1:** Complete search strategies used in the identified data sources and results.

| **Search strategy used in each data source** | initial 'N' | N after filters* |
| --- | --- | --- |
| **Basis of peer-reviewed literature** |  |  |
| **MEDLINE/PUBMED**  (((("drinking water"[Title/Abstract] OR "drink water"[Title/Abstract] OR drinkwater[Title/Abstract] OR "drinking water safety"[Title/Abstract] OR "potable water"[Title/Abstract] OR "safe water"[Title/Abstract] OR "safe water drinking"[Title/Abstract] OR "water for human consumption"[Title/Abstract] OR "water supply"[Title/Abstract] OR "water supplies"[Title/Abstract] OR "water distribution"[Title/Abstract] OR "water system"[Title/Abstract] OR "water systems"[Title/Abstract] OR "water supply system"[Title/Abstract] OR "water supply systems"[Title/Abstract]) AND ("public health surveillance"[Title/Abstract] OR monitoring OR surveillance OR "health care surveillance"[Title/Abstract] OR "healthcare surveillance"[Title/Abstract] OR "drinking water quality surveillance system"[Title/Abstract] OR "drinking water quality surveillance"[Title/Abstract] OR "water quality surveillance system"[Title/Abstract] OR "water quality surveillance"[Title/Abstract] OR "quality surveillance"[Title/Abstract])) AND ("water quality"[Title/Abstract] OR "water monitoring"[Title/Abstract] OR "water quality monitoring"[Title/Abstract] OR "monitoring water"[Title/Abstract] OR "monitoring water quality"[Title/Abstract] OR "water standard"[Title/Abstract] OR "water quality standard"[Title/Abstract] OR "sanitary surveys"[Title/Abstract] OR "sanitary survey water quality monitoring"[Title/Abstract] OR "regulatory compliance"[Title/Abstract] OR "water treatment"[Title/Abstract] OR "water purification"[Title/Abstract] OR "water management"[Title/Abstract] OR "water safety"[Title/Abstract] OR "water safety plan"[Title/Abstract] OR "water security"[Title/Abstract] OR "compliance control"[Title/Abstract] OR compliance[Title/Abstract])) AND (government[Title/Abstract] OR "federal government"[Title/Abstract] OR "government agencies"[Title/Abstract] OR "government agency"[Title/Abstract] OR "government programmes"[Title/Abstract] OR "government programs"[Title/Abstract] OR "government program"[Title/Abstract] OR "local government"[Title/Abstract] OR "municipal government"[Title/Abstract] OR "state government"[Title/Abstract] OR "department of agriculture"[Title/Abstract] OR "environmental protection agency"[Title/Abstract] OR "government agencies"[Title/Abstract] OR "health care"[Title/Abstract] OR "health system"[Title/Abstract] OR healthcare[Title/Abstract] OR "health care systems"[Title/Abstract] OR "health care system"[Title/Abstract] OR "healthcare systems"[Title/Abstract] OR "healthcare system"[Title/Abstract] OR "health care delivery"[Title/Abstract] OR "delivery of health care"[Title/Abstract] OR "delivery of healthcare"[Title/Abstract] OR "health care supply"[Title/Abstract] OR "healthcare delivery"[Title/Abstract] OR "healthcare supply"[Title/Abstract] OR "healthcare deliveries"[Title/Abstract] OR "public health service"[Title/Abstract] OR "health department"[Title/Abstract] OR "national health care"[Title/Abstract] OR "public health administration"[Title/Abstract] OR "public health care"[Title/Abstract] OR "public health center"[Title/Abstract] OR "public health organization"[Title/Abstract] OR "public health organization"[Title/Abstract] OR "public health practice"[Title/Abstract] OR "health care organization"[Title/Abstract] OR "allied health organization"[Title/Abstract] OR "allied health organization"[Title/Abstract] OR "health care coalitions"[Title/Abstract] OR "health care organization"[Title/Abstract] OR "health care rationing"[Title/Abstract] OR "health care structure"[Title/Abstract] OR "health organization"[Title/Abstract] OR "health organization"[Title/Abstract] OR "health systems agencies"[Title/Abstract] OR "healthcare organization"[Title/Abstract] OR "healthcare organization"[Title/Abstract] OR "healthcare rationing"[Title/Abstract] OR "healthcare structure"[Title/Abstract])) OR (("drinking water" OR "water supply") AND ("public health surveillance" OR sanitation) AND ("water quality" OR "quality control" OR "water purification") AND (government OR "federal government" OR "state government" OR "delivery of health care")[MeSH Terms]) | 720 | 720 |
| **WEB OF SCIENCE**  TÓPICO: ("drinking water" OR "drink water" OR drinkwater OR "drinking water safety" OR "potable water" OR "safe water" OR "safe water drinking" OR "water for human consumption" OR "water supply" OR "water supplies" OR "water distribution" OR "water system" OR "water systems" OR "water supply system" OR "water supply systems") AND TÓPICO: ("public health surveillance" OR monitoring OR surveillance OR "health care surveillance" OR "healthcare surveillance" OR "drinking water quality surveillance system" OR "drinking water quality surveillance" OR "water quality surveillance system" OR "water quality surveillance" OR "quality surveillance") AND TÓPICO: ("water quality" OR "water monitoring" OR "water quality monitoring" OR "monitoring water" OR "monitoring water quality" OR "water standard" OR "water quality standard" OR "sanitary surveys" OR "sanitary survey water quality monitoring" OR "regulatory compliance" OR "water treatment" OR "water purification" OR "water management" OR "water safety" OR "water safety plan" OR "water security" OR "compliance control" OR compliance) AND TÓPICO: (government OR "federal government" OR "government agencies" OR "government agency" OR "government programmes" OR "government programs" OR "government program" OR "local government" OR "municipal government" OR "state government" OR "department of agriculture" OR "environmental protection agency" OR "government agencies" OR "health care" OR "health system" OR healthcare OR "health care systems" OR "health care system" OR "healthcare systems" OR "healthcare system" OR "health care delivery" OR "delivery of health care" OR "delivery of healthcare" OR "health care supply" OR "healthcare delivery" OR "healthcare supply" OR "healthcare deliveries" OR "public health service" OR "health department" OR "national health care" OR "public health administration" OR "public health care" OR "public health center" OR "public health organization" OR "public health organization" OR "public health practice" OR "health care organization" OR "allied health organization" OR "allied health organization" OR "health care coalitions" OR "health care organization" OR "health care rationing" OR "health care structure" OR "health organization" OR "health organization" OR "health systems agencies" OR "healthcare organization" OR "healthcare organization" OR "healthcare rationing" OR "healthcare structure") | 546 | 511 |
| **SCOPUS**  ( TITLE-ABS-KEY ( "drinking water" OR "drink water" OR drinkwater OR "drinking water safety" OR "potable water" OR "safe water" OR "safe water drinking" OR "water for human consumption" OR "water supply" OR "water supplies" OR "water distribution" OR "water system" OR "water systems" OR "water supply system" OR "water supply systems" ) AND TITLE-ABS-KEY ( "public health surveillance" OR monitoring OR surveillance OR "health care surveillance" OR "healthcare surveillance" OR "drinking water quality surveillance system" OR "drinking water quality surveillance" OR "water quality surveillance system" OR "water quality surveillance" OR "quality surveillance" ) AND TITLE-ABS-KEY ( "water quality" OR "water monitoring" OR "water quality monitoring" OR "monitoring water" OR "monitoring water quality" OR "water standard" OR "water quality standard" OR "sanitary surveys" OR "sanitary survey water quality monitoring" OR "regulatory compliance" OR "water treatment" OR "water purification" OR "water management" OR "water safety" OR "water safety plan" OR "water security" OR "compliance control" OR compliance ) AND TITLE-ABS-KEY ( government OR "federal government" OR "government agencies" OR "government agency" OR "government programmes" OR "government programs" OR "government program" OR "local government" OR "municipal government" OR "state government" OR "department of agriculture" OR "environmental protection agency" OR "government agencies" OR "health care" OR "health system" OR healthcare OR "health care systems" OR "health care system" OR "healthcare systems" OR "healthcare system" OR "health care delivery" OR "delivery of health care" OR "delivery of healthcare" OR "health care supply" OR "healthcare delivery" OR "healthcare supply" OR "healthcare deliveries" OR "public health service" OR "health department" OR "national health care" OR "public health administration" OR "public health care" OR "public health center" OR "public health organization" OR "public health organization" OR "public health practice" OR "health care organization" OR "allied health organization" OR "allied health organization" OR "health care coalitions" OR "health care organization" OR "health care rationing" OR "health care structure" OR "health organization" OR "health organization" OR "health systems agencies" OR "healthcare organization" OR "healthcare organization" OR "healthcare rationing" OR "healthcare structure" ) ) AND ( LIMIT-TO ( DOCTYPE , "ar" ) OR LIMIT-TO ( DOCTYPE , "cp" ) OR LIMIT-TO ( DOCTYPE , "ch" ) OR LIMIT-TO ( DOCTYPE , "sh" ) OR LIMIT-TO ( DOCTYPE , "bk" ) OR LIMIT-TO ( DOCTYPE , "dp" ) | 2030 | 1823 |
| **EMBASE**  ('drinking water':ti,ab,kw OR 'drink water':ti,ab,kw OR drinkwater:ti,ab,kw OR 'drinking water safety':ti,ab,kw OR 'potable water':ti,ab,kw OR 'safe water':ti,ab,kw OR 'safe water drinking':ti,ab,kw OR 'water for human consumption':ti,ab,kw OR 'water supply':ti,ab,kw OR 'water supplies':ti,ab,kw OR 'water distribution':ti,ab,kw OR 'water system':ti,ab,kw OR 'water systems':ti,ab,kw OR 'water supply system':ti,ab,kw OR 'water supply systems':ti,ab,kw) AND ('public health surveillance':ti,ab,kw OR monitoring:ti,ab,kw OR surveillance:ti,ab,kw OR 'health care surveillance':ti,ab,kw OR 'healthcare surveillance':ti,ab,kw OR 'drinking water quality surveillance system':ti,ab,kw OR 'drinking water quality surveillance':ti,ab,kw OR 'water quality surveillance system':ti,ab,kw OR 'water quality surveillance':ti,ab,kw OR 'quality surveillance':ti,ab,kw) AND ('water quality':ti,ab,kw OR 'water monitoring':ti,ab,kw OR 'water quality monitoring':ti,ab,kw OR 'monitoring water':ti,ab,kw OR 'monitoring water quality':ti,ab,kw OR 'water standard':ti,ab,kw OR 'water quality standard':ti,ab,kw OR 'sanitary surveys':ti,ab,kw OR 'sanitary survey water quality monitoring':ti,ab,kw OR 'regulatory compliance':ti,ab,kw OR 'water treatment':ti,ab,kw OR 'water purification':ti,ab,kw OR 'water management':ti,ab,kw OR 'water safety':ti,ab,kw OR 'water safety plan':ti,ab,kw OR 'water security':ti,ab,kw OR 'compliance control':ti,ab,kw OR compliance:ti,ab,kw) AND (government:ti,ab,kw OR 'federal government':ti,ab,kw OR 'government agency':ti,ab,kw OR 'government programmes':ti,ab,kw OR 'government programs':ti,ab,kw OR 'government program':ti,ab,kw OR 'local government':ti,ab,kw OR 'municipal government':ti,ab,kw OR 'state government':ti,ab,kw OR 'department of agriculture':ti,ab,kw OR 'environmental protection agency':ti,ab,kw OR 'government agencies':ti,ab,kw OR 'health care':ti,ab,kw OR 'health system':ti,ab,kw OR healthcare:ti,ab,kw OR 'health care systems':ti,ab,kw OR 'health care system':ti,ab,kw OR 'healthcare systems':ti,ab,kw OR 'healthcare system':ti,ab,kw OR 'health care delivery':ti,ab,kw OR 'delivery of health care':ti,ab,kw OR 'delivery of healthcare':ti,ab,kw OR 'health care supply':ti,ab,kw OR 'healthcare delivery':ti,ab,kw OR 'healthcare supply':ti,ab,kw OR 'healthcare deliveries':ti,ab,kw OR 'public health service':ti,ab,kw OR 'health department':ti,ab,kw OR 'national health care':ti,ab,kw OR 'public health administration':ti,ab,kw OR 'public health care':ti,ab,kw OR 'public health center':ti,ab,kw OR 'public health organization':ti,ab,kw OR 'public health practice':ti,ab,kw OR 'allied health organization':ti,ab,kw OR 'health care coalitions':ti,ab,kw OR 'health care organization':ti,ab,kw OR 'health care rationing':ti,ab,kw OR 'health care structure':ti,ab,kw OR 'health organization':ti,ab,kw OR 'health systems agencies':ti,ab,kw OR 'healthcare organization':ti,ab,kw OR 'healthcare rationing':ti,ab,kw OR 'healthcare structure':ti,ab,kw) OR (('drinking water'/exp/mj OR 'drink water'/exp/mj OR 'drinkwater'/exp/mj OR 'drinking water safety' OR 'potable water'/exp/mj OR 'safe water' OR 'safe water drinking' OR 'water for human consumption' OR 'water supply'/exp/mj OR 'water supplies' OR 'water distribution'/exp/mj OR 'water system'/exp/mj OR 'water systems' OR 'water supply system' OR 'water supply systems') AND ('public health surveillance'/exp/mj OR 'monitoring'/exp/mj OR 'surveillance'/exp/mj OR 'health care surveillance'/exp/mj OR 'healthcare surveillance'/exp/mj OR 'drinking water quality surveillance system' OR 'drinking water quality surveillance' OR 'water quality surveillance system' OR 'water quality surveillance' OR 'quality surveillance') AND ('water quality'/exp/mj OR 'water monitoring'/exp/mj OR 'water quality monitoring'/exp/mj OR 'monitoring water' OR 'monitoring water quality' OR 'water standard'/exp/mj OR 'water quality standard'/exp/mj OR 'sanitary surveys' OR 'sanitary survey water quality monitoring' OR 'regulatory compliance' OR 'water treatment'/exp/mj OR 'water purification'/exp/mj OR 'water management'/exp/mj OR 'water safety'/exp/mj OR 'water safety plan'/exp/mj OR 'water security' OR 'compliance control' OR 'compliance'/exp/mj) AND ('government'/exp/mj OR 'federal government'/exp/mj OR 'government agency' OR 'government programmes'/exp/mj OR 'government programs'/exp/mj OR 'government program' OR 'local government'/exp/mj OR 'municipal government'/exp/mj OR 'state government'/exp/mj OR 'department of agriculture'/exp/mj OR 'environmental protection agency' OR 'government agencies'/exp/mj OR 'health care'/exp/mj OR 'health system'/exp/mj OR 'healthcare'/exp/mj OR 'health care systems' OR 'health care system'/exp/mj OR 'healthcare systems' OR 'healthcare system'/exp/mj OR 'health care delivery'/exp/mj OR 'delivery of health care'/exp/mj OR 'delivery of healthcare'/exp/mj OR 'health care supply'/exp/mj OR 'healthcare delivery'/exp/mj OR 'healthcare supply'/exp/mj OR 'healthcare deliveries' OR 'public health service'/exp/mj OR 'health department'/exp/mj OR 'national health care'/exp/mj OR 'public health administration'/exp/mj OR 'public health care'/exp/mj OR 'public health center'/exp/mj OR 'public health organization'/exp/mj OR 'public health practice'/exp/mj OR 'allied health organization'/exp/mj OR 'health care coalitions'/exp/mj OR 'health care organization'/exp/mj OR 'health care rationing'/exp/mj OR 'health care structure'/exp/mj OR 'health organization'/exp/mj OR 'health systems agencies'/exp/mj OR 'healthcare organization'/exp/mj OR 'healthcare rationing'/exp/mj OR 'healthcare structure'/exp/mj)) | 289 | 260 |
| **ENGINEERING VILLAGE**  ((("drinking water" OR "drink water" OR drinkwater OR "drinking water safety" OR "potable water" OR "safe water" OR "safe water drinking" OR "water for human consumption" OR "water supply" OR "water supplies" OR "water distribution" OR "water system" OR "water systems" OR "water supply system" OR "water supply systems") AND ("public health surveillance" OR monitoring OR surveillance OR "health care surveillance" OR "healthcare surveillance" OR "drinking water quality surveillance system" OR "drinking water quality surveillance" OR "water quality surveillance system" OR "water quality surveillance" OR "quality surveillance") AND ("water quality" OR "water monitoring" OR "water quality monitoring" OR "monitoring water" OR "monitoring water quality" OR "water standard" OR "water quality standard" OR "sanitary surveys" OR "sanitary survey water quality monitoring" OR "regulatory compliance" OR "water treatment" OR "water purification" OR "water management" OR "water safety" OR "water safety plan" OR "water security" OR "compliance control" OR compliance) AND (government OR "federal government" OR "government agencies" OR "government agency" OR "government programmes" OR "government programs" OR "government program" OR "local government" OR "municipal government" OR "state government" OR "department of agriculture" OR "environmental protection agency" OR "government agencies" OR "health care" OR "health system" OR healthcare OR "health care systems" OR "health care system" OR "healthcare systems" OR "healthcare system" OR "health care delivery" OR "delivery of health care" OR "delivery of healthcare" OR "health care supply" OR "healthcare delivery" OR "healthcare supply" OR "healthcare deliveries" OR "public health service" OR "health department" OR "national health care" OR "public health administration" OR "public health care" OR "public health center" OR "public health organization" OR "public health organization" OR "public health practice" OR "health care organization" OR "allied health organization" OR "allied health organization" OR "health care coalitions" OR "health care organization" OR "health care rationing" OR "health care structure" OR "health organization" OR "health organization" OR "health systems agencies" OR "healthcare organization" OR "healthcare organization" OR "healthcare rationing" OR "healthcare structure")) WN KY) | 676 | 676 |
| **LILACS VIA BVS (PT)**  ("água potável" OR "água de beber" OR "água para consumo humano" OR "água para o consumo humano" OR "água segura" OR "abastecimento de água" OR "abastecimento de água para consumo humano" OR "aprovisionamento público de água" OR "fornecimentos de água" OR "serviços de abastecimento de água potável" OR "sistema de abastecimento de água" OR "sistema de abastecimento de água para consumo humano" OR "sistema de abastecimento público de água" OR "sistema de fornecimento de água" OR "sistemas de abastecimento de água" OR "sistemas de abastecimento público de água") AND (saneamento OR "saneamento ambiental" OR "vigilância em saúde pública" OR "Plano de vigilância em saúde" OR "vigilância da saúde" OR "vigilância da saúde pública" OR "vigilância em saúde" OR "vigilância da qualidade" OR vigilância) AND ("critérios de qualidade da água" OR "qualidade da água" OR "tratamento da água") AND (governo OR "governo estadual" OR "estado federado" OR "governo estatal" OR "governo provincial" OR "unidade federal" OR "governo federal" OR "estado" OR "governo nacional" OR "união federal" OR "governo local" OR "governo da cidade" OR "governo da municipalidade" OR "governo do condado" OR "governo do município" OR "governo metropolitano" OR "governo municipal" OR "órgãos governamentais" OR "agências governamentais") | 94 | 94 |
| **LILACS VIA BVS (EN)**  ("drinking water" OR "drink water" OR drinkwater OR "drinking water safety" OR "potable water" OR "safe water" OR "safe water drinking" OR "water for human consumption" OR "water supply" OR "water supplies" OR "water distribution" OR "water system" OR "water systems" OR "water supply system" OR "water supply systems") AND ("public health surveillance" OR monitoring OR surveillance OR "health care surveillance" OR "healthcare surveillance" OR sanitation OR "environmental sanitation" OR "environment sanitation" OR "drinking water quality surveillance system" OR "drinking water quality surveillance" OR "water quality surveillance system" OR "water quality surveillance" OR "quality surveillance") AND ("quality control" OR quality OR "quality assessment" OR "quality assurance" OR "water quality" OR "water monitoring" OR "water quality monitoring" OR "monitoring water" OR "monitoring water quality" OR "water standard" OR "water quality standard" OR "sanitary surveys" OR "sanitary survey water quality monitoring" OR "regulatory compliance" OR "water treatment" OR "water purification" OR "water management" OR "water safety" OR "water safety plan" OR "water security" OR "compliance control" OR compliance) AND (government OR "federal government" OR "government agencies" OR "government agency" OR "government programmes" OR "government programs" OR "government program" OR "local government" OR "municipal government" OR "state government" OR "department of agriculture" OR "environmental protection agency" OR "government agencies" OR "health care" OR "health system" OR healthcare OR "health care systems" OR "health care system" OR "healthcare systems" OR "healthcare system" OR "health care delivery" OR "delivery of health care" OR "delivery of healthcare" OR "health care supply" OR "healthcare delivery" OR "healthcare supply" OR "healthcare deliveries" OR "public health service" OR "health department" OR "national health care" OR "public health administration" OR "public health care" OR "public health center" OR "public health organization" OR "public health organization" OR "public health practice" OR "health care organization" OR "allied health organization" OR "allied health organization" OR "health care coalitions" OR "health care organization" OR "health care rationing" OR "health care structure" OR "health organization" OR "health organization" OR "health systems agencies" OR "healthcare organization" OR "healthcare organization" OR "healthcare rationing" OR "healthcare structure") | 33 | 33 |
| **Gray literature** |  |  |
| **GOOGLE SCHOLAR**  ("potable water" OR "drinking water" OR "water supply") AND (surveillance OR "quality  surveillance") AND ("water quality" OR "quality control") AND (government OR "health care  delivery" OR "public health service" OR "health care organization") | 21800 | 100** |
| **BDTD**  (Todos os campos: "água potável" OR "abastecimento de água" E Todos os campos: "vigilância em saúde pública" E Todos os campos: "qualidade da água") | 2 | 2 |
| Catálogo de Teses e Dissertações da CAPES  ("vigilância em saúde" AND "qualidade da água) | 36 | 19 |
| **OATD**  ("potable water" OR "drinking water" OR "water supply") AND (surveillance OR "quality  surveillance") AND ("water quality" OR "quality control") AND (government OR "health care  delivery" OR "public health service" OR "health care organization") | 2 | 2 |
| **PQDT**  ("drinking water") AND ("public health surveillance") AND ("water quality") AND (government OR "health care delivery" OR "public health service" OR "health care organization") | 7 | 7 |
| **Total** | **26235** | **4247** |
| * When possible, filters were used in the databases to exclude types of studies (reviews, editorials, letters to the editor, comments, abstracts of congresses and conferences).  ** In Google Scholar, the relevance criterion was used, inserting only the first 100 occurrences. | | |
