# Supplementary material for: Worldwide Surveillance Actions and Initiatives of Drinking Water Quality: A Scoping Review
Source: Preprints.org preprint supplement (doi:10.20944/preprints202209.0214.v1), 2022-09-15
Supplement: Supplementary file 3 [file Table_S.2.docx]

**Table S2.** Reasons for exclusion of the publications analyzed in full text.

| **Title** | **Reason for exclusion** |
| --- | --- |
| Prenatal exposure to nitrate in drinking water and the risk of congenital anomalies. | It was not a surveillance action of water quality |
| Water quality laboratories in Colombia: a GIS-based study of urban and rural accessibility. |
| Determinants of compliance with drinking water standards in rural Puerto Rico between 1996 and 2000: a multilevel approach. |
| Water quality and health in a Sahelian semi-arid urban context: an integrated geographical approach in Nouakchott, Mauritania. |
| Estimating pesticides in public drinking water at the household level in Denmark |
| European union approach in monitoring drinking water quality: Emergency case management and risk analysis for the protection of public health |
| Arsenic levels in drinking water and mortality of liver cancer in Taiwan |
| Evolution in access to fluoridated water in São Paulo state, Brazil, from the 1950s to the early 21st century |
| Water quality associated public health risk in Bo, Sierra Leone. | Focused only on the methods of treating or controlling water |
| Long-term monitoring and risk assessment of N-nitrosamines in the finished water of drinking water treatment plants in South Korea. |
| Developing a national framework for safe drinking water--case study from Iceland. | Did not meet the study objectives |
| Public Water Waste Reporting: Contextual Correlates and Conservation Outcomes |
| Vigilância da Qualidade da Água para Consumo Humano: avaliando o grau de implementação das ações |
| Vigilância da qualidade da água para consumo humano no âmbito municipal: contornos, desafios e possibilidades |
| Avaliação do programa de vigilância da qualidade da água para consumo humano no município de Buíque - Pernambuco |
| Contaminação por agrotóxicos carbamatos e organofosforados emágua para consumo humano de Dourados, MS, 2008 a 2009 |
| Fluoretação da água e insuficiências no sistema de informação da política de vigilância à saúde |
| Surveillance of rural drinking water quality in NSW |
| Cobertura das ações de Vigilância da Qualidade da Água para consumo humano e indicadores de vulnerabilidade nos municípios do Semiárido nordestino. |
| Guideline levels for PFOA and PFOS in drinking water: the role of scientific uncertainty, risk assessment decisions, and social factors | Type of study was not adequate |
| Analysis of the correlation of diarrhea disease occurrence with drinking-water quality in the city of vitória-ES | Duplicates |
| Arsenic levels in drinking water supplies from underground sources in the Autonomous Community of Madrid |
| Evolução do acesso à água fluoretada no Estado de São Paulo, Brasil: dos anos 1950 à primeira década do século XXI |
| Heterocontrole do parâmetro fluoreto na água de abastecimento público de municípios da região metropolitana de Curitiba |
